# Supplementary material for: Cullin-3 regulates the renal baroreceptor machinery that controls renin gene expression
Source: JCI journal article supplement (doi:10.1172/jci.insight.194075), 2025-07-08

Full Unedited Blots

Figure 4

Full unedited blots for Figure 4A

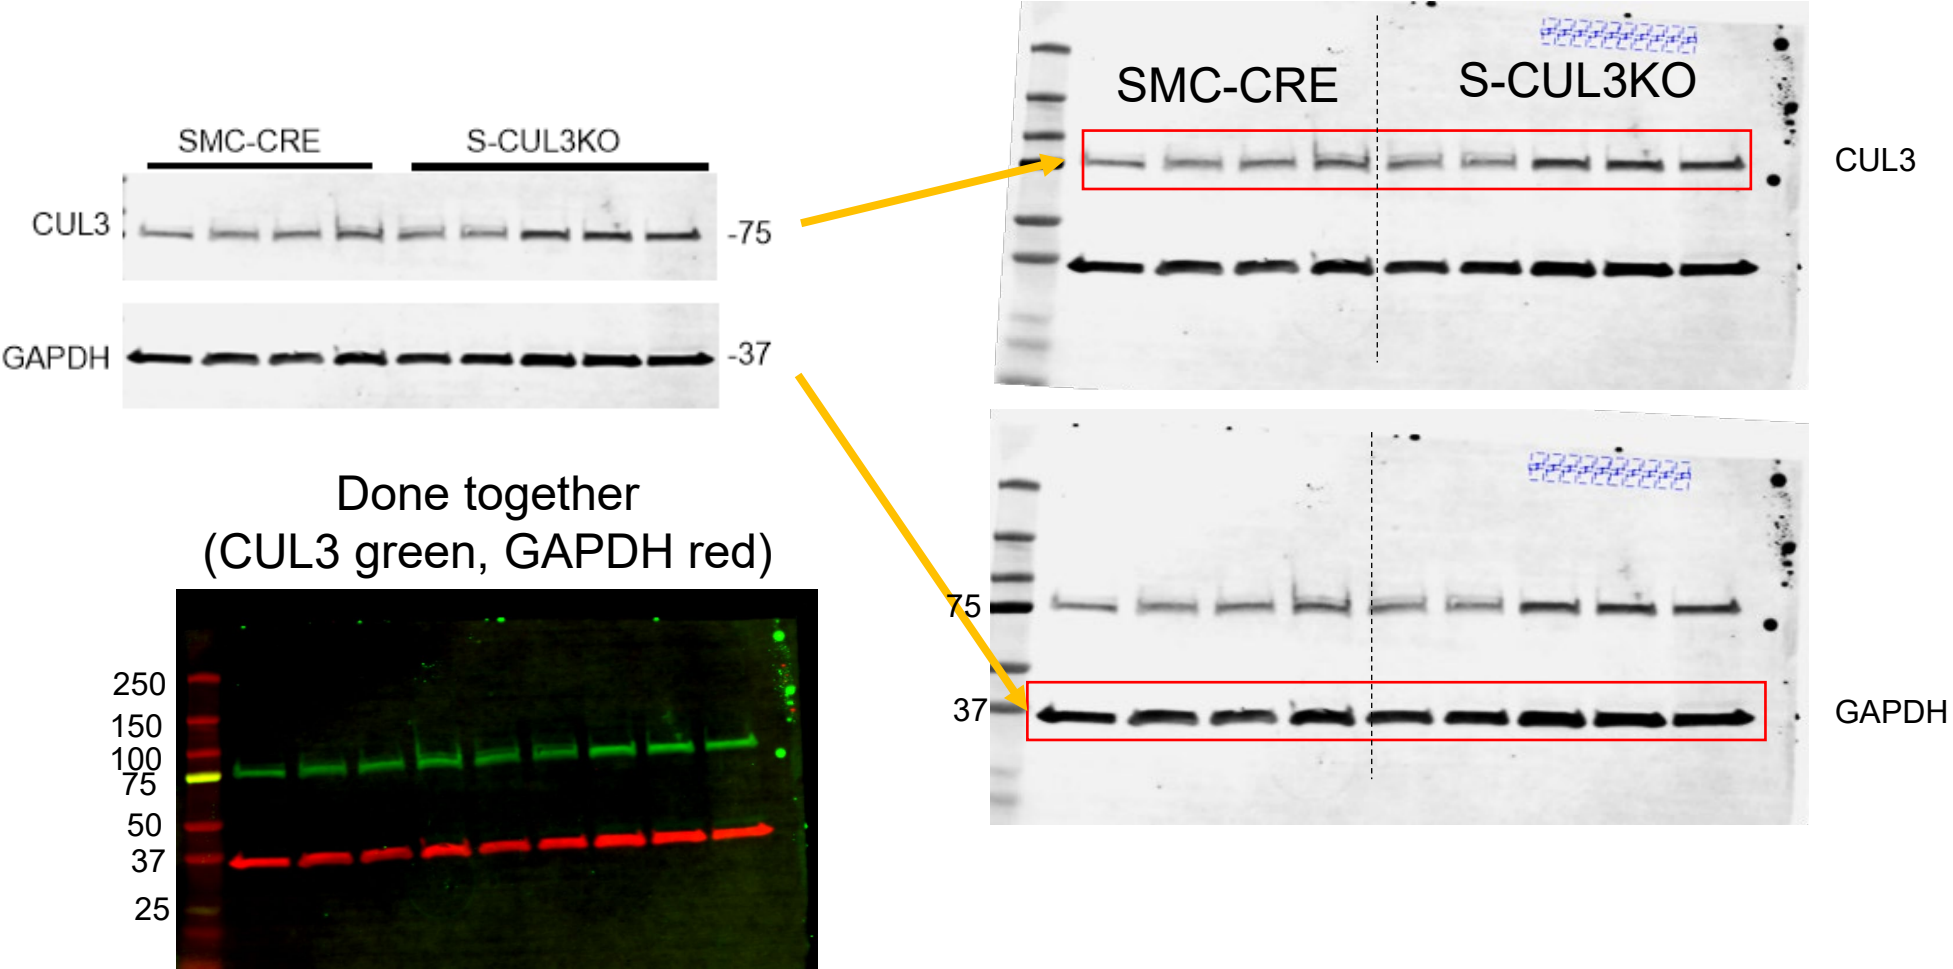

Figure 6C

Full unedited blots for Figure 6C

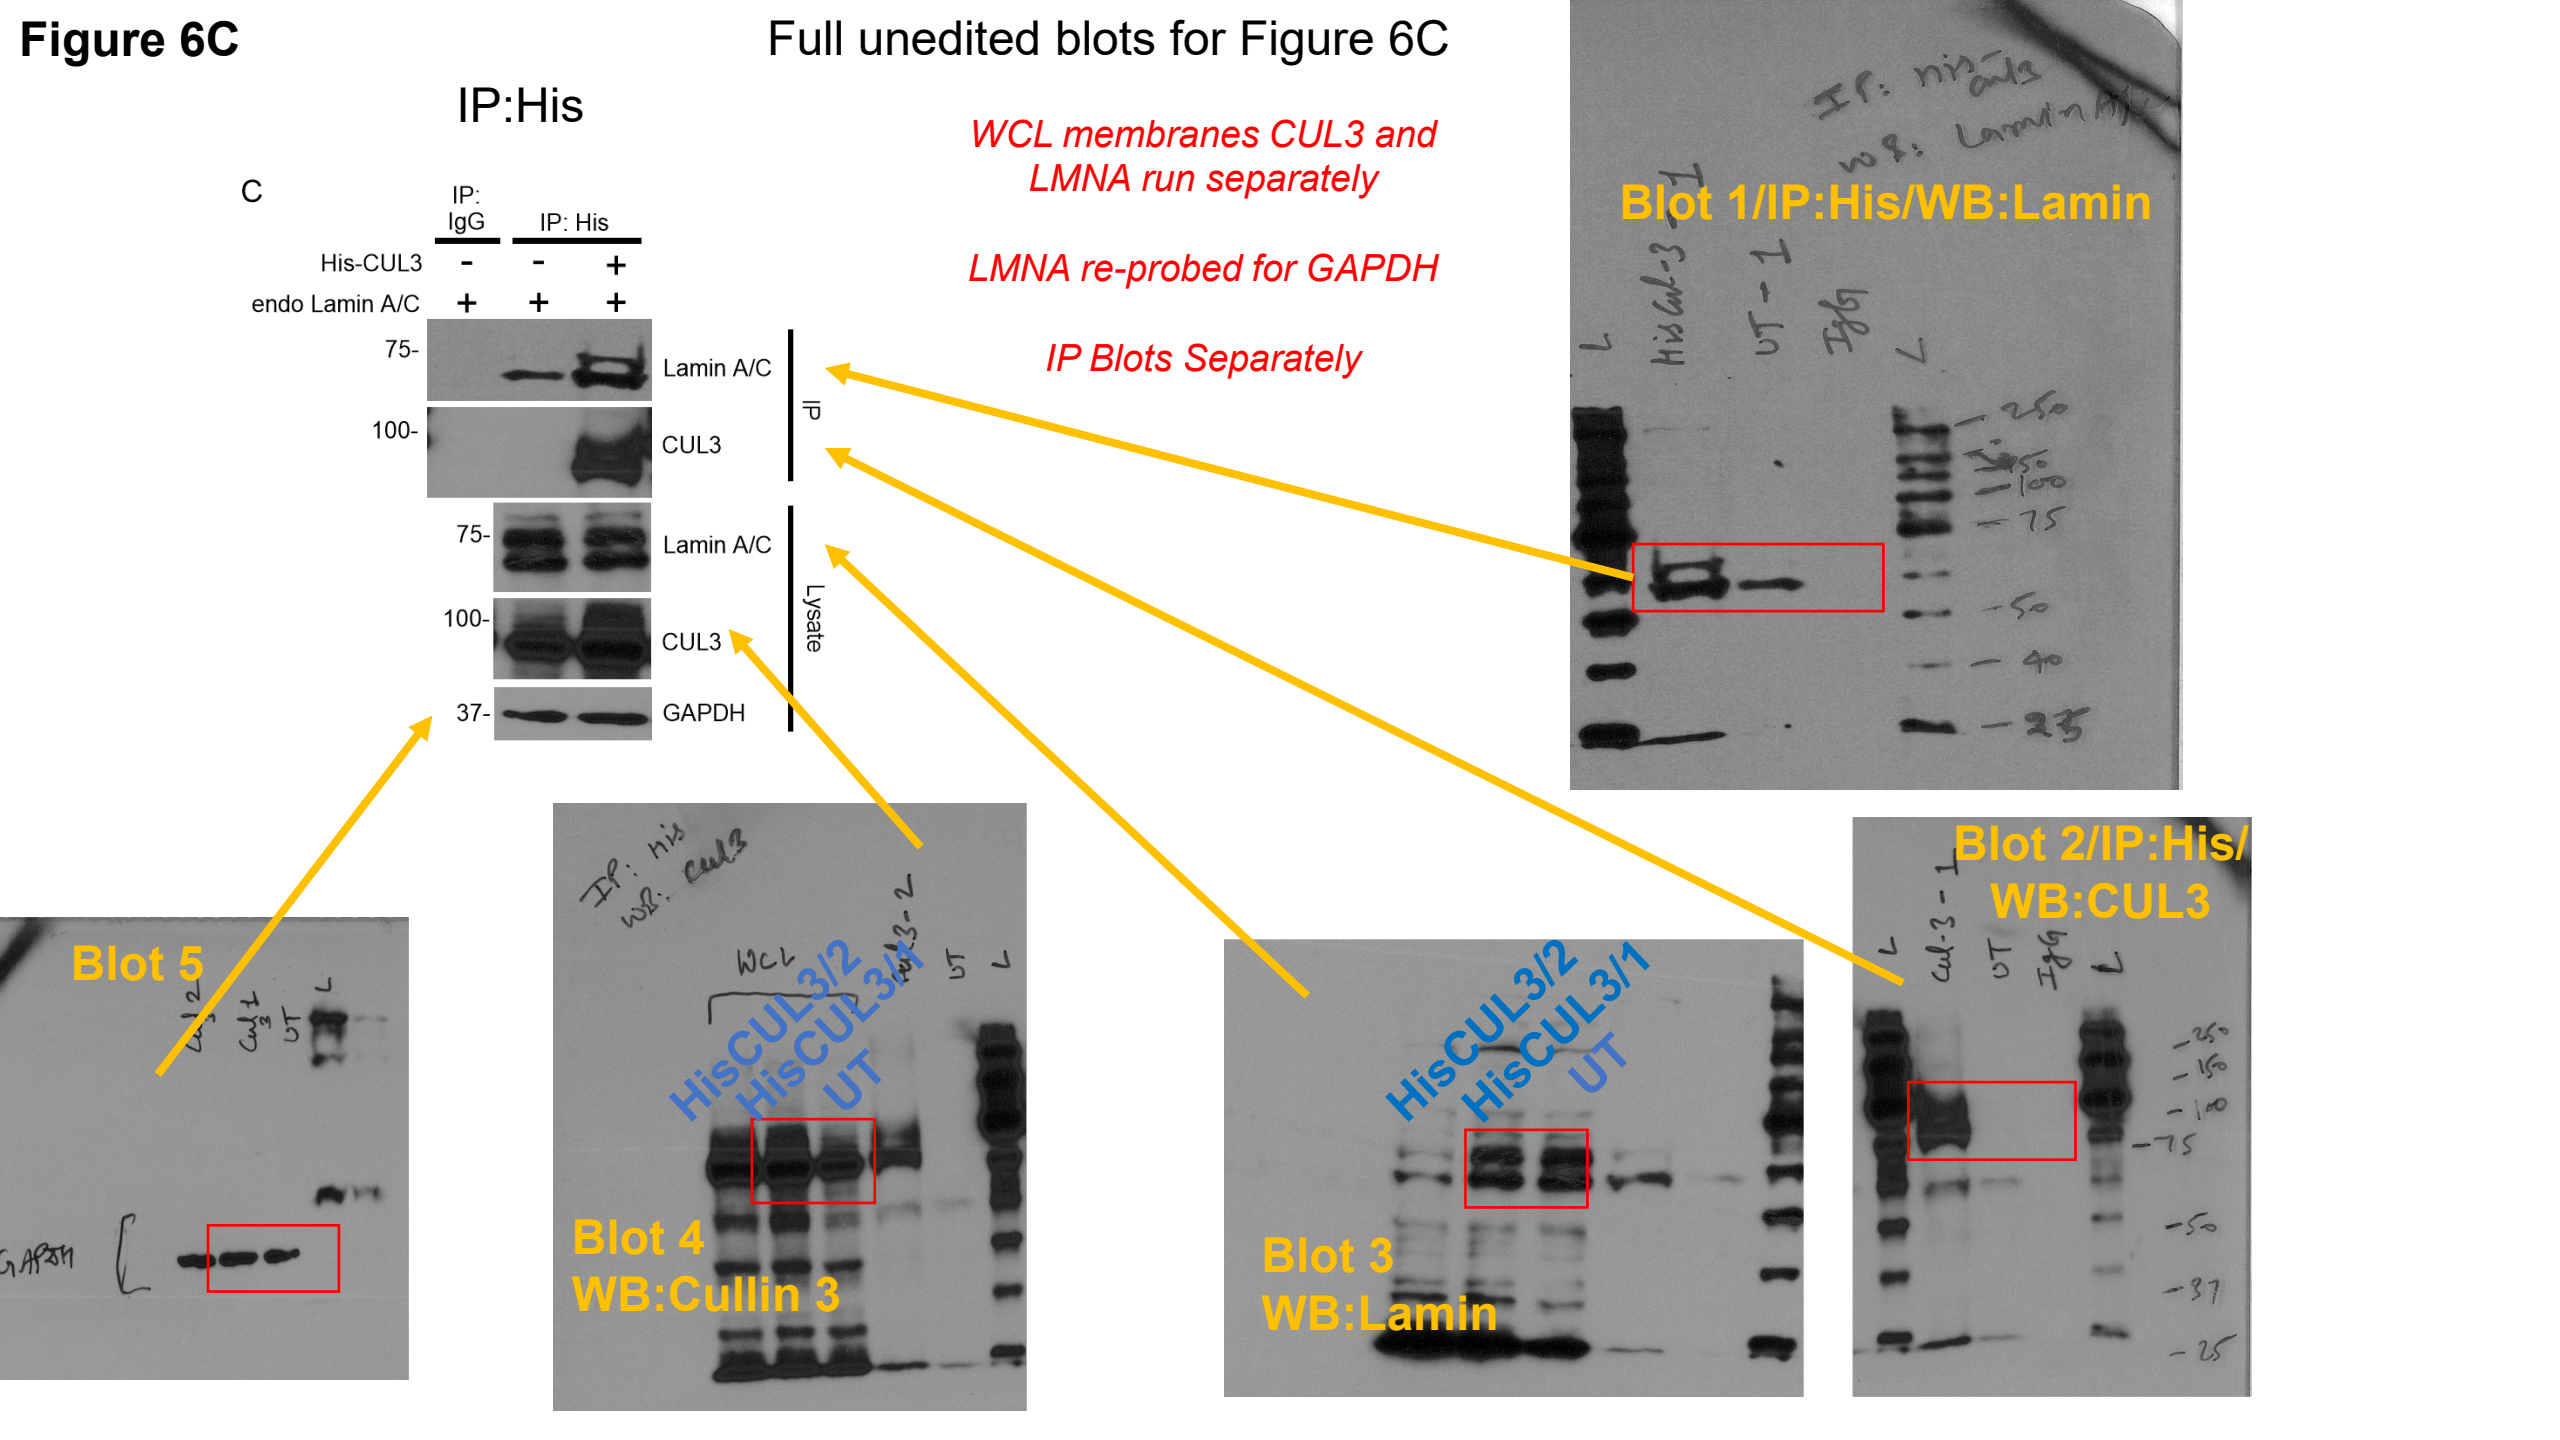

Figure 6D

Full unedited blots for Figure 6D

D

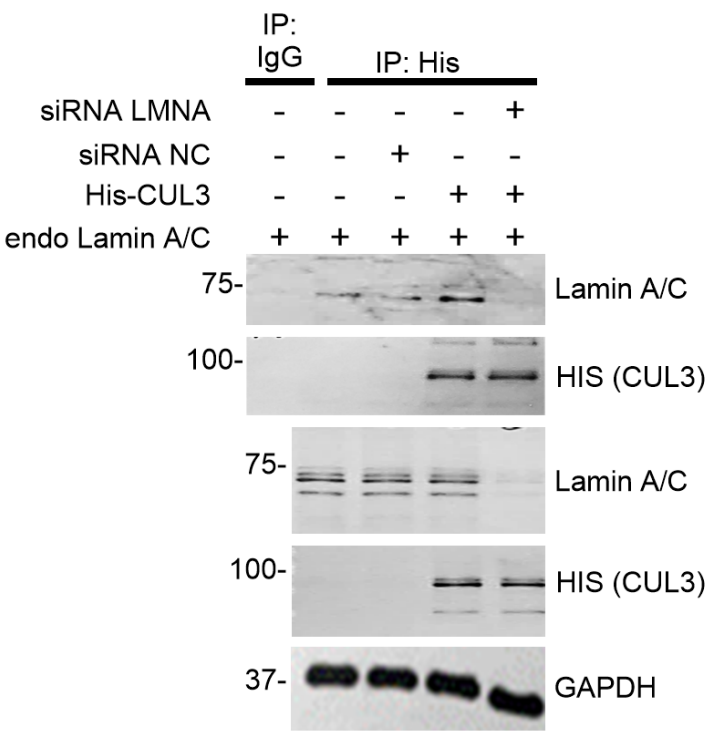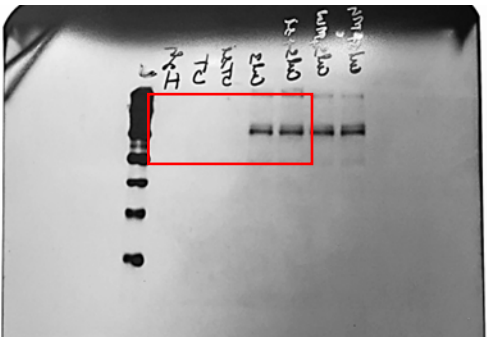

Lane 1: only lysate + IgG  
Lane 2: Empty vector (UT) + His beads

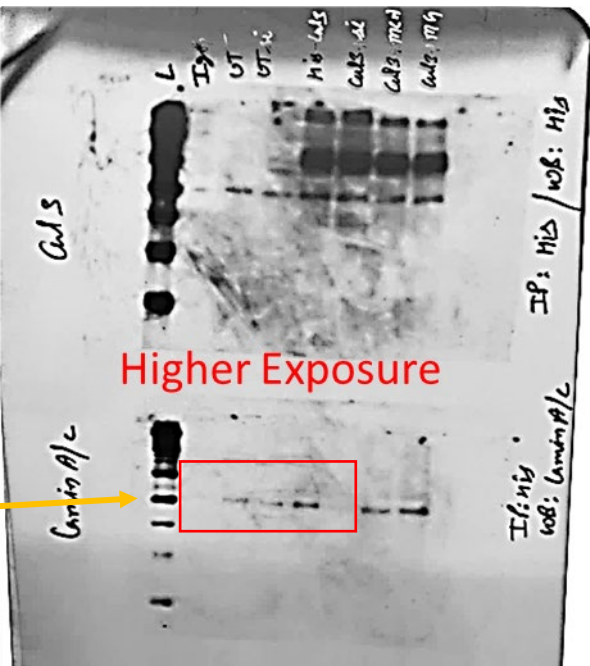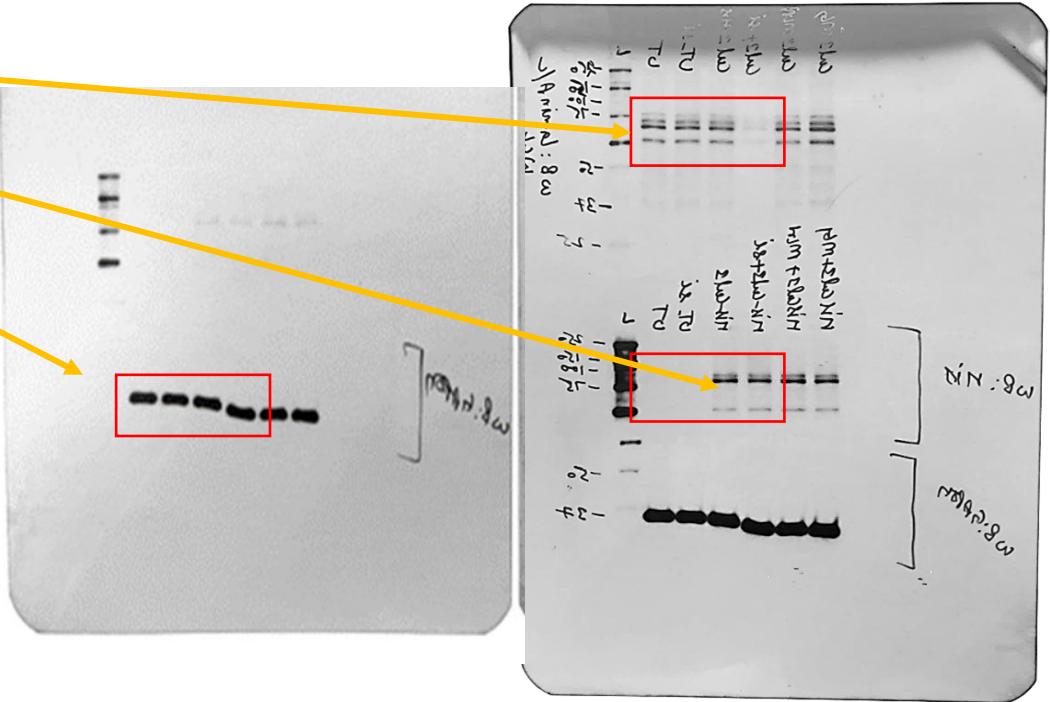

WCL: all run separately  
The membrane was cut to check CUL3-His (top) an  
GAPDH (bottom)  
IPs run separately

## Figure 7B

Full unedited blots for Figure 7B

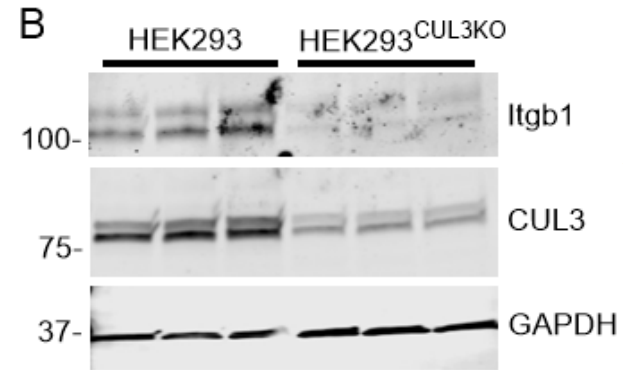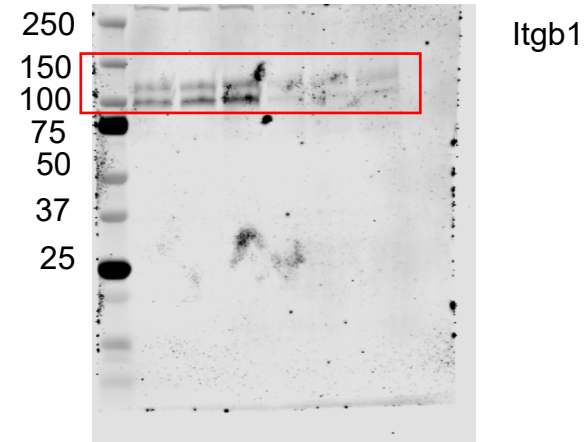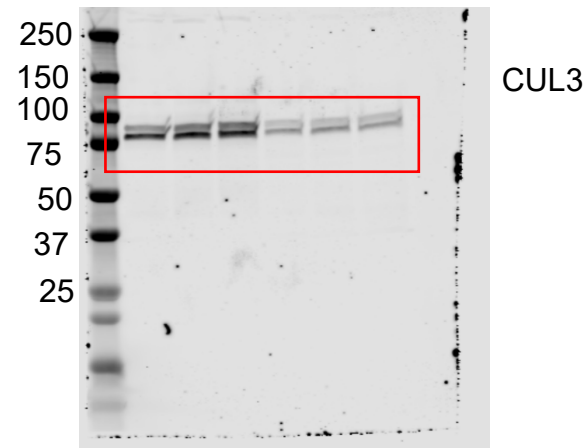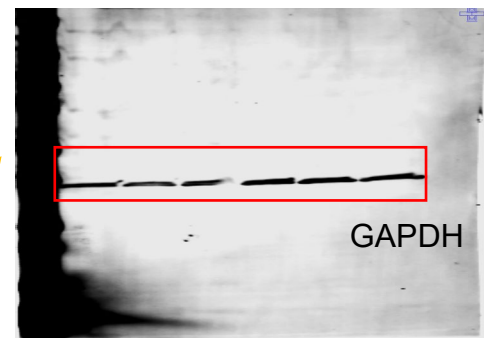

- 1) ITGB1+GAPDH together (LiCor 2 channels)
- 2) re-probed for CUL3



## Figure 7C

Full unedited blots for Figure 7C

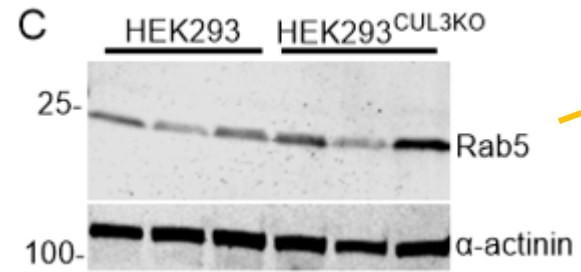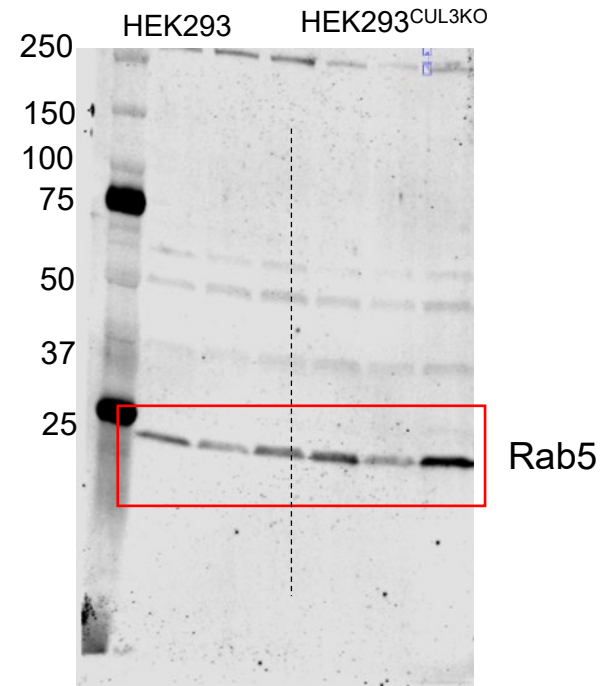

- 1) Rab5
- 2) α-Actinin

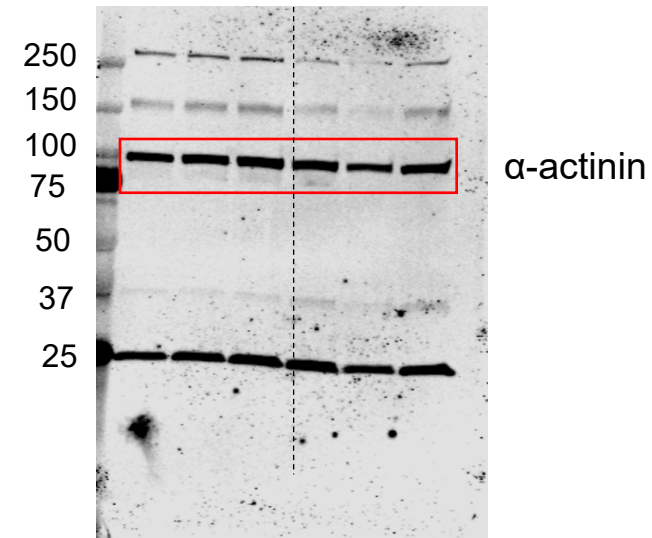

# Figure 7E

Full unedited blots for Figure 7E

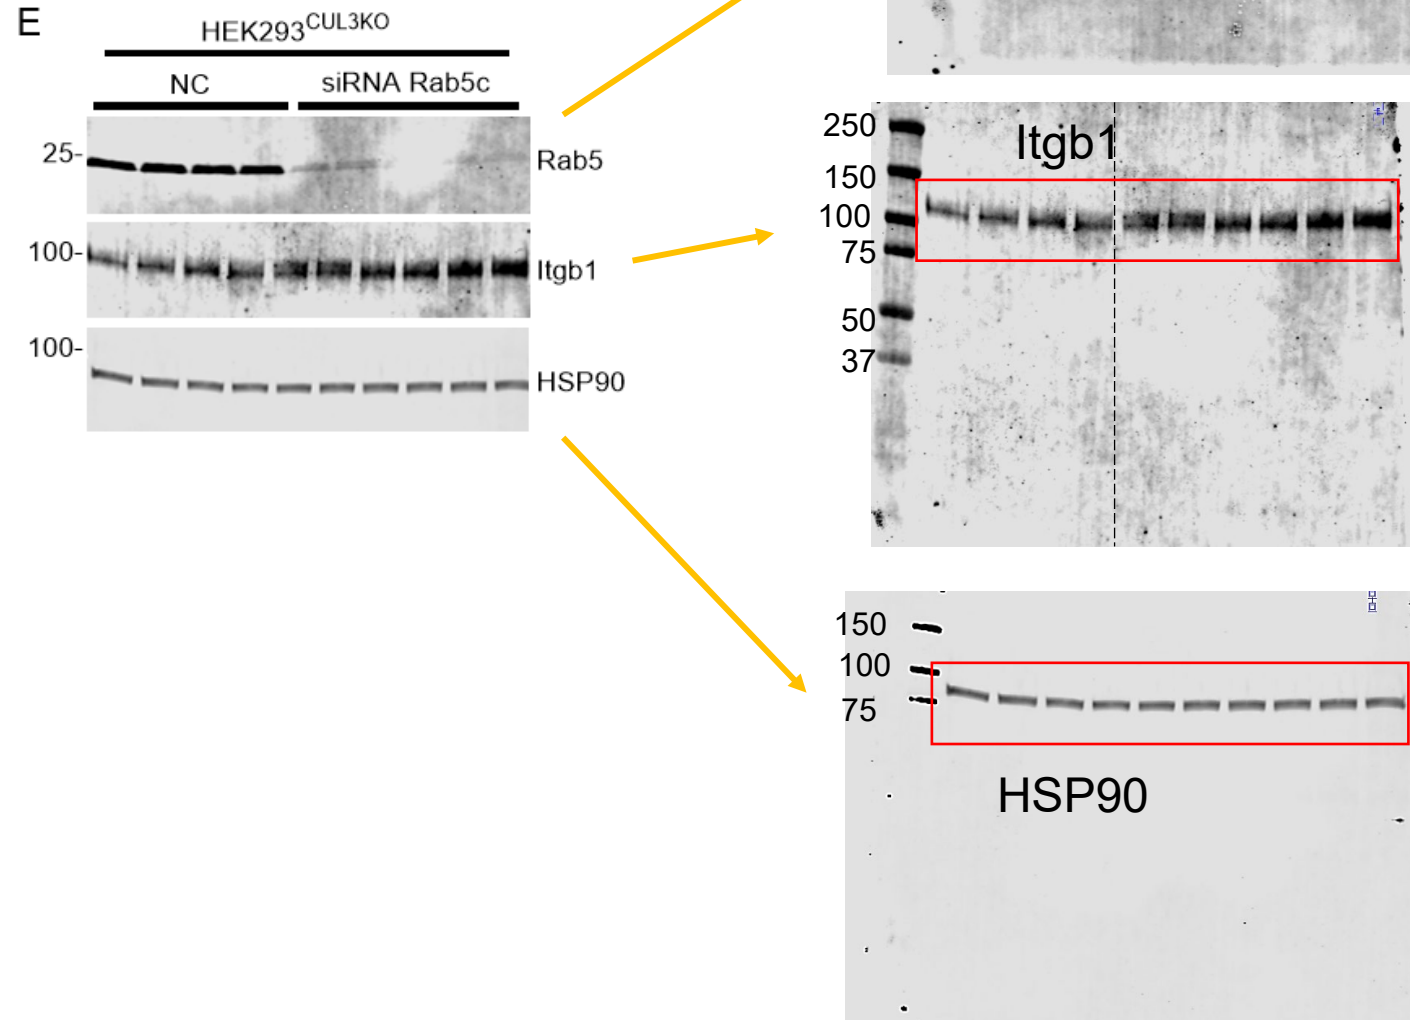

Order of probes.  
1) Rab5  
2) Itgb1  
3) HSP90

**Figure 7G** Full unedited blots for Figure 7G

**G**

IP: IgG      IP: His (CUL3)

|   |   |   |   |   |            |
|---|---|---|---|---|------------|
| - | - | - | - | + | siRNA Rab5 |
| - | - | + | - | - | siRNA NC   |
| - | - | - | + | + | His-CUL3   |
| + | + | + | + | + | endo Rab5  |

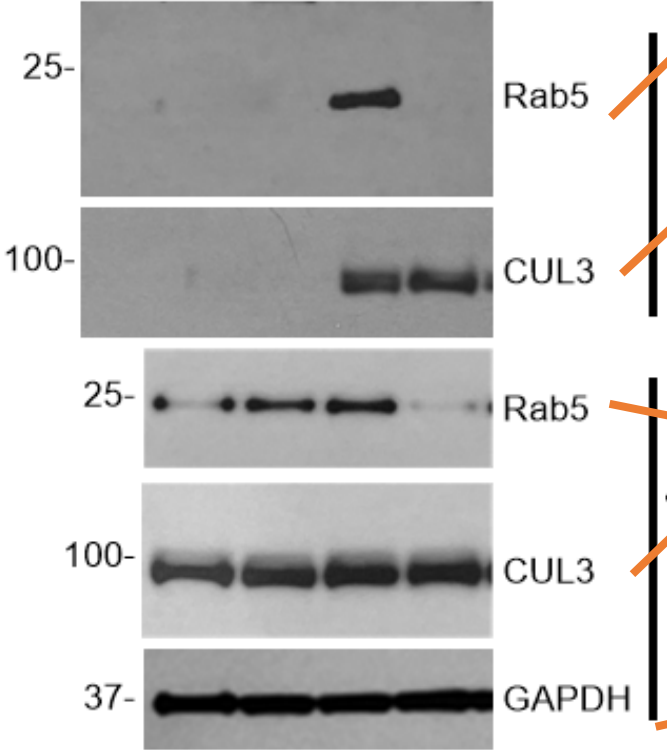

Lower exposure\_CUL3

Higher exposure\_CUL3

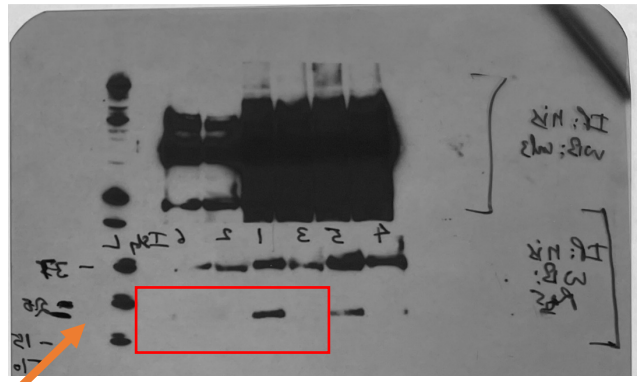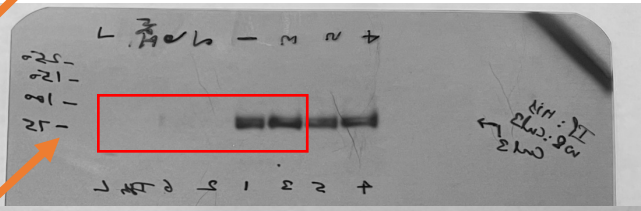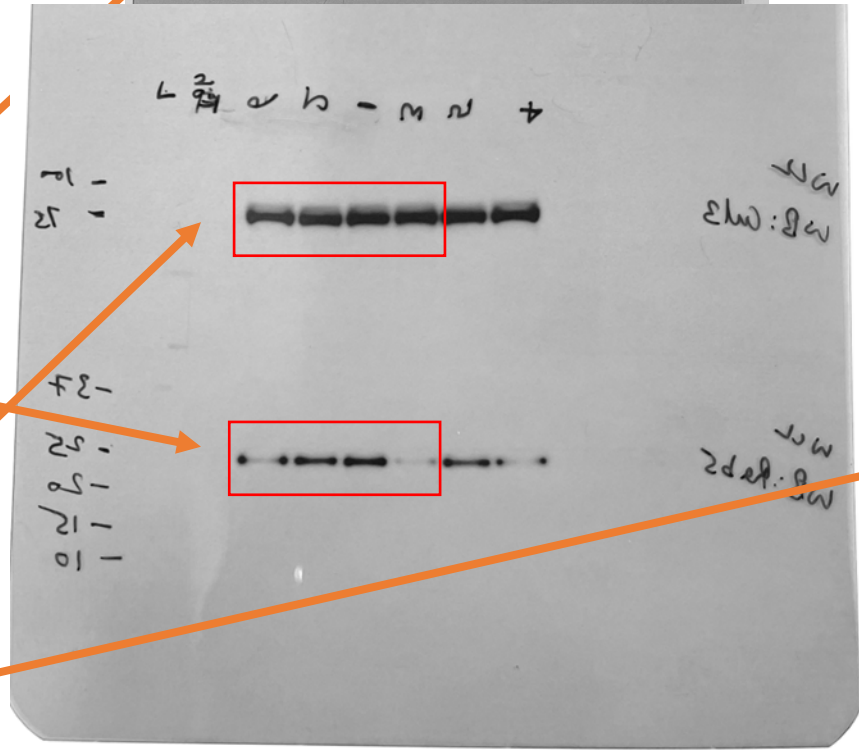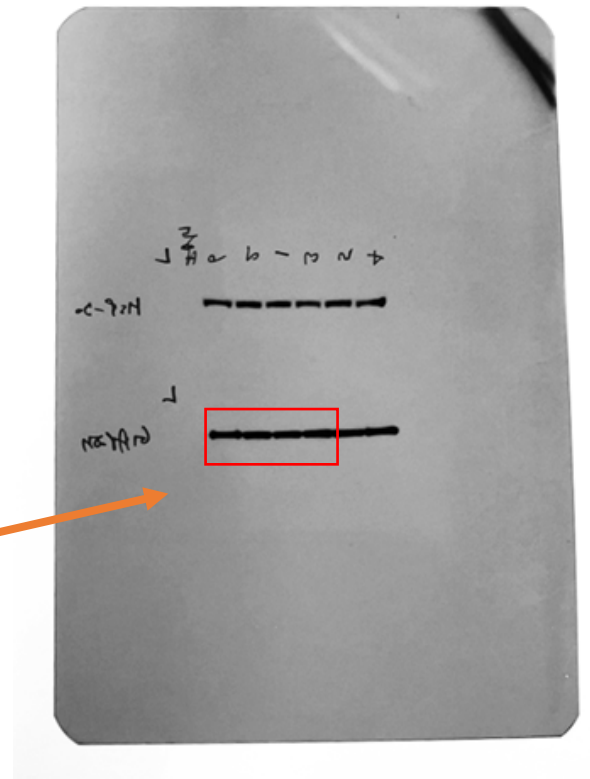



**Figure 8C**

Full unedited blots for Figure 8C

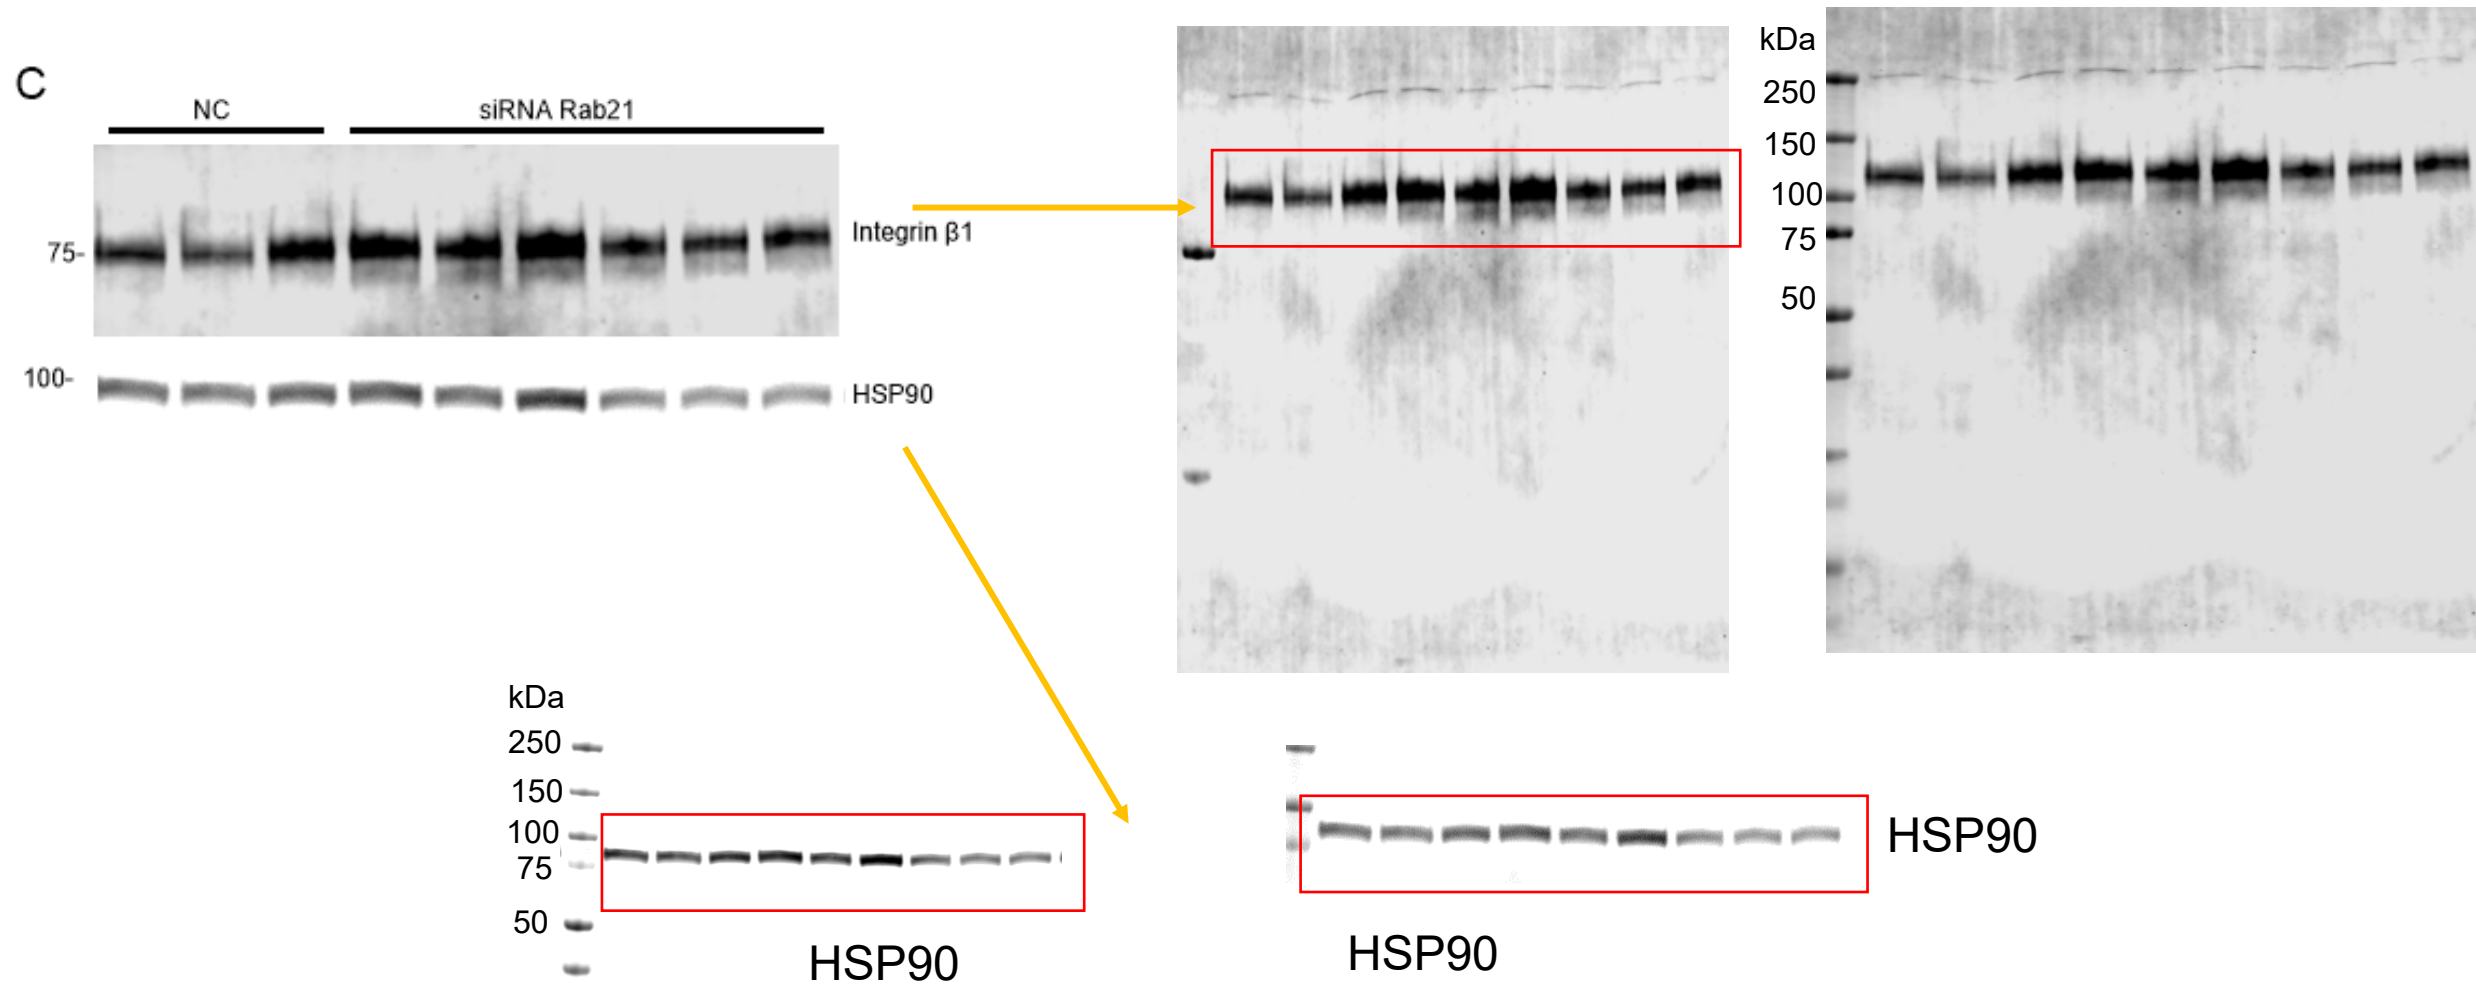

Supplement: sd2 [file 2]
