# Supplementary material for: Cullin-3 regulates the renal baroreceptor machinery that controls renin gene expression
Source: JCI journal article supplement (doi:10.1172/jci.insight.194075), 2025-07-08
Supplement: sd1 [file 1]

## **Supplemental Figures and Tables**

Cullin-3 Regulates the Renal Baroreceptor Machinery that Controls Renin Gene Expression

Daria Golosova<sup>1</sup>, Gaurav Kumar<sup>1</sup>, Ko-Ting Lu<sup>1</sup>, Patricia C. Muskus Veitia<sup>1</sup>, Ana Hantke Guixa<sup>1</sup>, Kelsey K. Wackman<sup>1</sup>, Eva M. Fekete<sup>1</sup>, Daniel T. Brozoski<sup>1</sup>, Justin L. Grobe<sup>1,2</sup>, Maria Luisa S. Sequeira-Lopez<sup>3</sup>, R. Ariel Gomez<sup>3</sup>, Pablo Nakagawa<sup>1,2</sup>, Curt D. Sigmund<sup>1,2</sup>.

<sup>1</sup> Department of Physiology, Medical College of Wisconsin, Milwaukee, WI

<sup>2</sup> Cardiovascular Center, Medical College of Wisconsin, Milwaukee, WI

<sup>3</sup> Department of Pediatrics, Child Health Research Center, University of Virginia School of Medicine, Charlottesville, Virginia

Corresponding Author:

Curt D. Sigmund

James J. Smith & Catherine Welsch Smith Chair of Physiology

Department of Physiology

Medical College of Wisconsin

8701 Watertown Plank Rd

Milwaukee, WI 53226

[csigmund@mcw.edu](mailto:csigmund@mcw.edu)

## Supplemental Tables and Figures

**Table S1: Kidney Function**

| Kidney Function    | Control; n=10* | S-CUL3KO; n=15 | P values |
|--------------------|----------------|----------------|----------|
| Diuresis, ml/day   | 0.67±0.13      | 0.49±0.05      | 0.2513   |
| Na, mmol/day       | 0.15±0.02      | 0.15±0.03      | 0.9539   |
| K, mmol/day        | 0.20±0.02      | 0.20±0.04      | 0.8759   |
| Na/Creatinine      | 37±4           | 44±6           | 0.3408   |
| K/Creatinine       | 52±7           | 57±4           | 0.5914   |
| Albumin, mg/day    | 0.48±0.10      | 0.29±0.08      | 0.1469   |
| Albumin/Creatinine | 0.77±0.20      | 0.74±0.19      | 0.8938   |

\*Control group – SMC-CRE+Tx or S-CUL3KO+corn oil

Table S1: Kidney function was measured six weeks after tamoxifen. P values are from a two-tailed T-test.

**Table S2: Transcutaneous Glomerular Filtration Rate**

| Kidney Function   | Control; n=11* | S-CUL3KO; n=11 | P value |
|-------------------|----------------|----------------|---------|
| tGFR, $\mu$ l/min | 1067 $\pm$ 76  | 1083 $\pm$ 93  | 0.8893  |

Control group – SMC-CRE+Tx or S-CUL3KO+corn oil

Table S2: Transcutaneous glomerular filtration rate (tGFR) was measured three weeks after tamoxifen.

**Table S3: Food and Water Intake.**

| Intake        | Control; n=10* | S-CUL3KO; n=15 | P value |
|---------------|----------------|----------------|---------|
| Water, ml/day | 3.69±0.33      | 4.03±0.39      | 0.4960  |
| Food, mg/day  | 2.95±0.15      | 3.15±0.23      | 0.4807  |

\*Control group – SMC-CRE+Tx or S-CUL3KO+corn oil

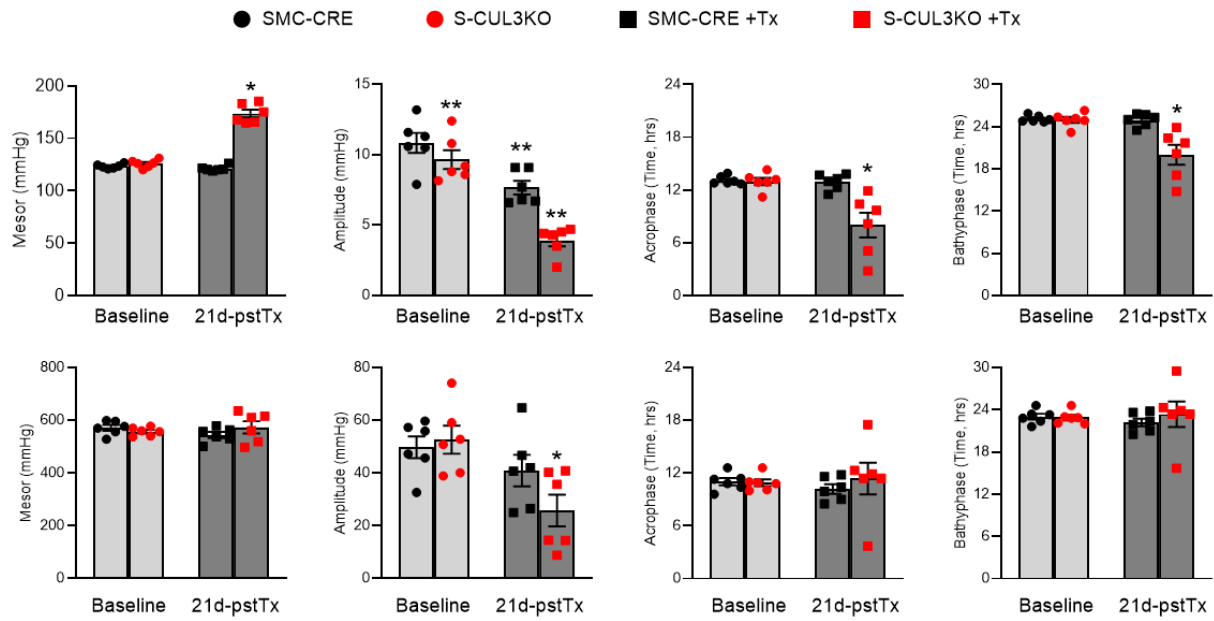

**Figure S1. Cosinor Analysis of BP and HR.** A cosinor analysis of SBP and HR was performed in a selection of 6 SMC-CRE and 6 S-CUL3KO at baseline and 21-days after Tx treatment. The same mice were analyzed before and after. \*, P < 0.05 S-CUL3KO +Tx vs SMC-CRE. \*\*, P < 0.05 all groups vs SMC-CRE.

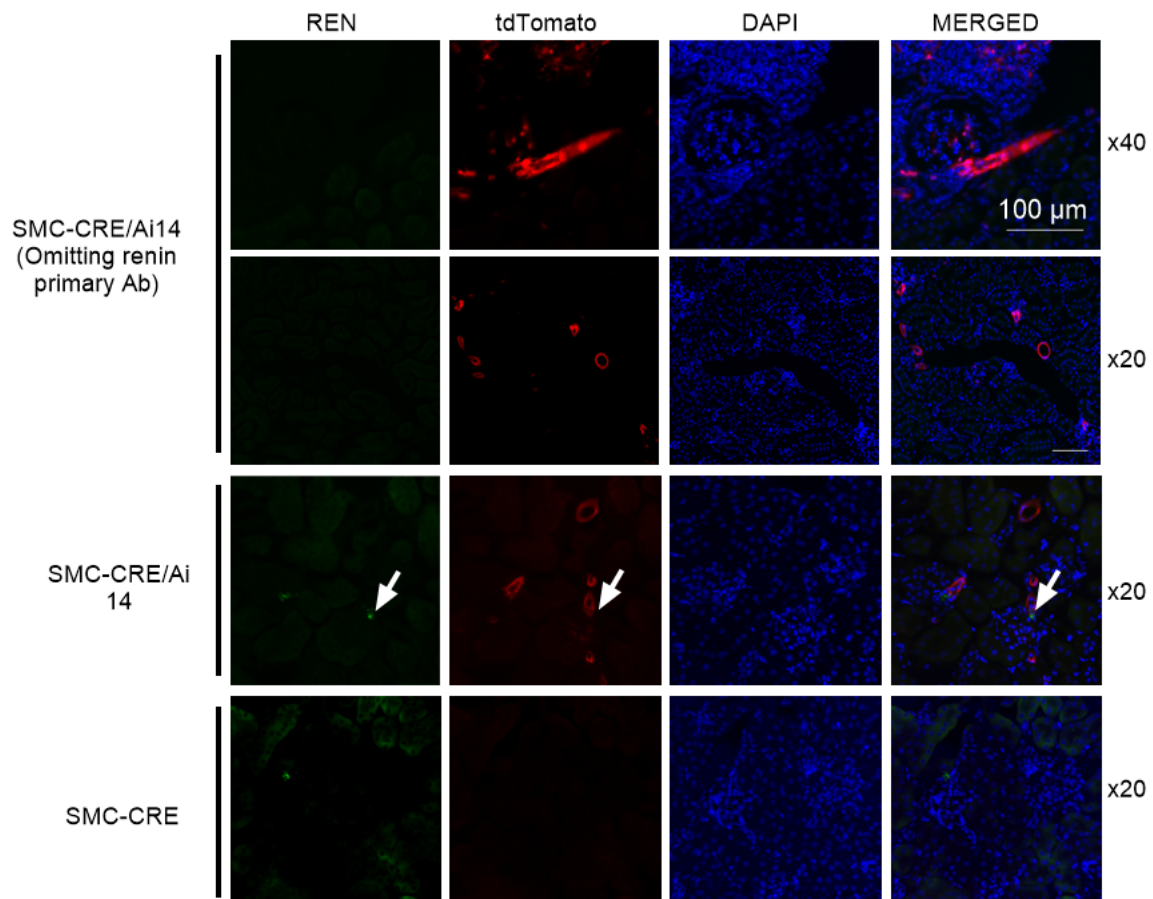

**Figure S2.** *SMC-CRE Activity in JG Cells.* Cre activity was evaluated by tdTomato (red) expression with dual immunofluorescence targeting *Ren1* (green) in SMC-CRE X Ai14 reporter mice. Top panel represents sections with the primary antibody targeting renin omitted. Bottom panels are additional sections illustrating Cre activity in renin-expressing JG cells.

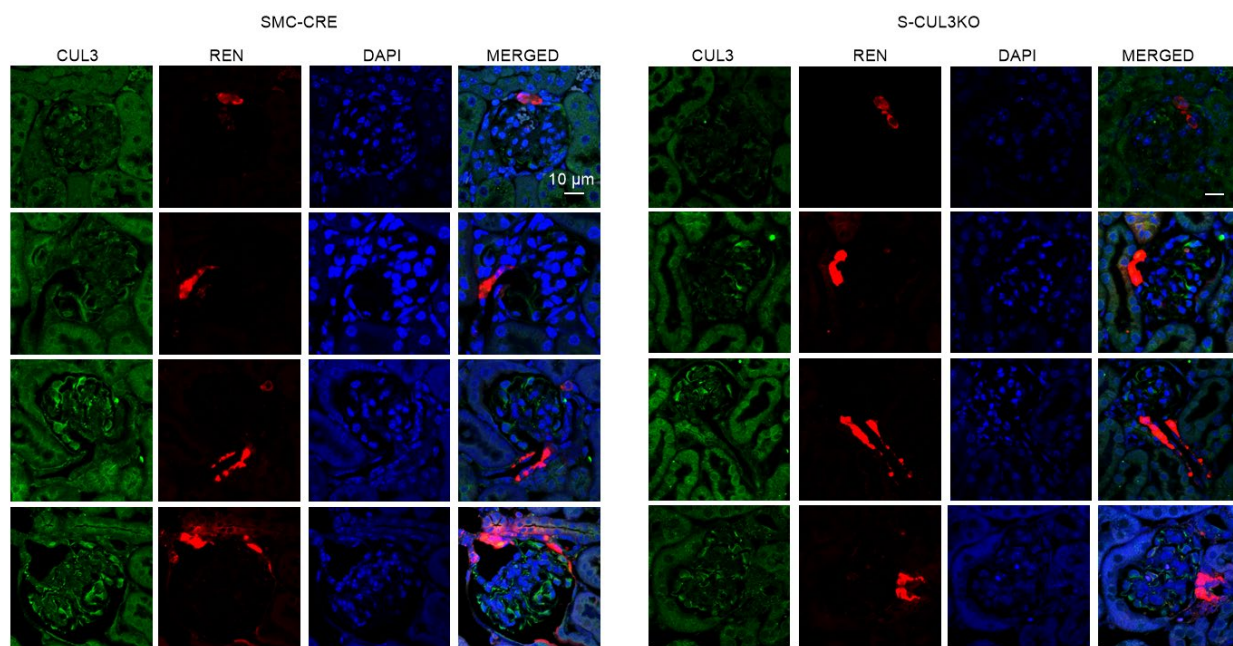

**Figure S3.** *Decreased Cul3 Expression in JG Cells.* Additional immunofluorescent images detecting CUL3 (green) and renin (red) expression.

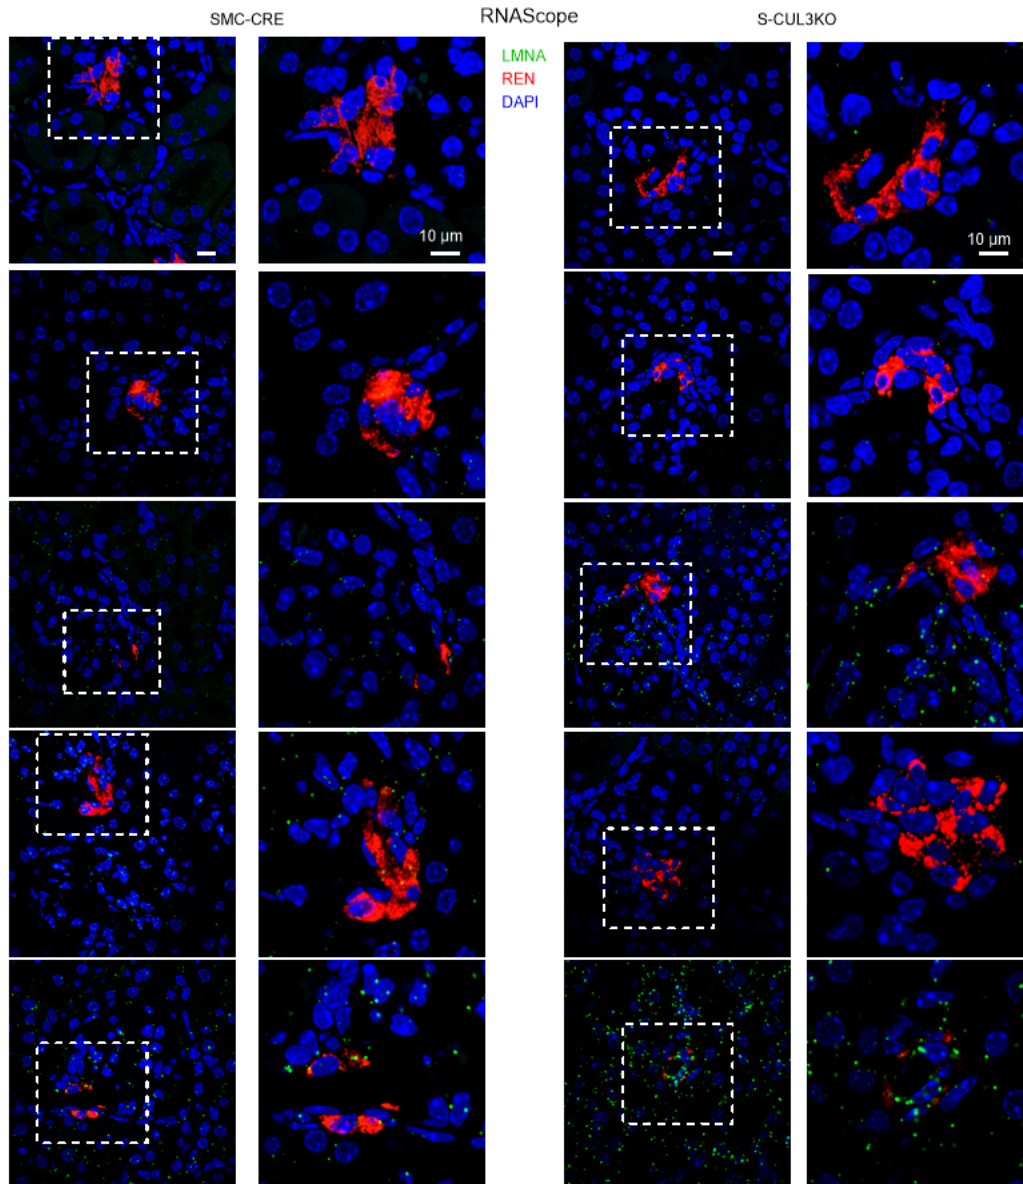

**Figure S4. Renal Lamina A/C Expression.** Additional representative RNAScope images demonstrating LMNA (green) and *Ren1* (red) mRNA in the JG area. Dashed rectangles indicate JG area with expanded view to the right.

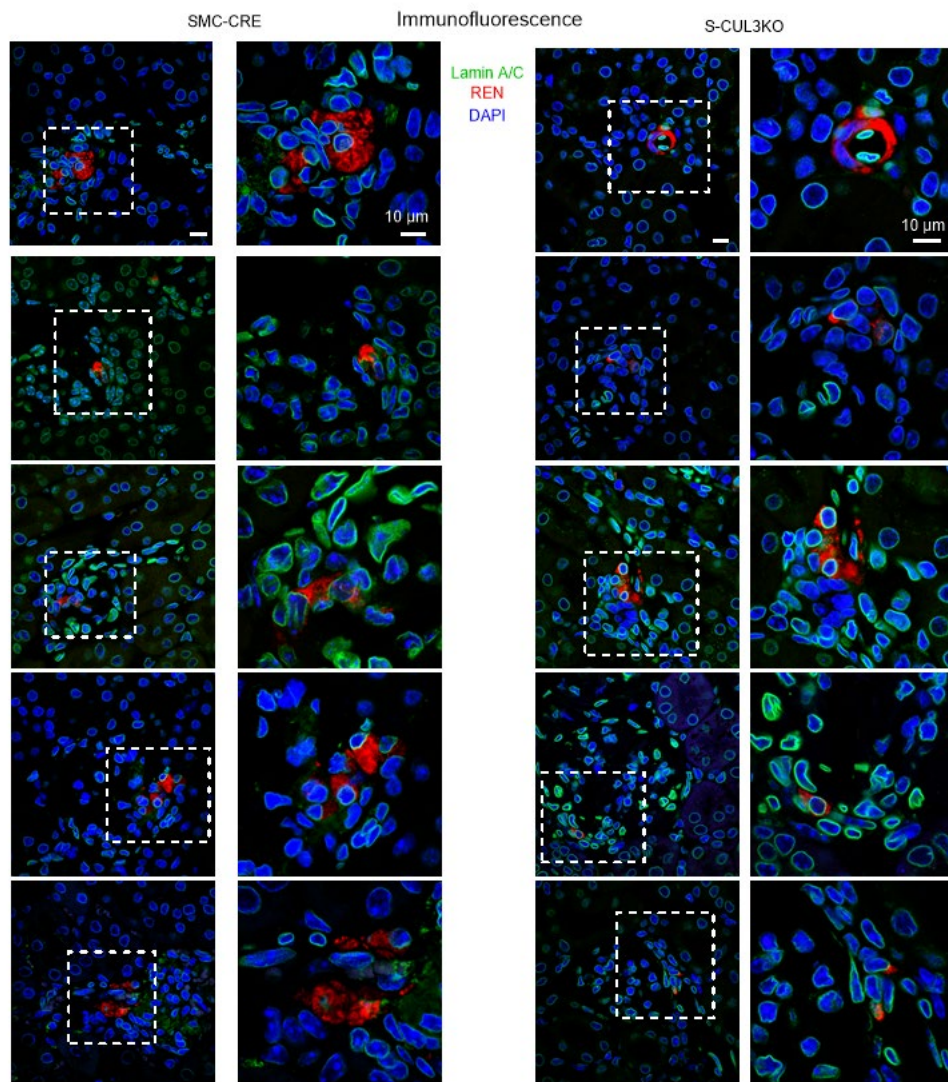

**Figure S5. Renal Lamin A/C Expression.** Additional representative immunofluorescent images demonstrating Lamin A/C (green) and *Ren1* (red) protein in the JG area

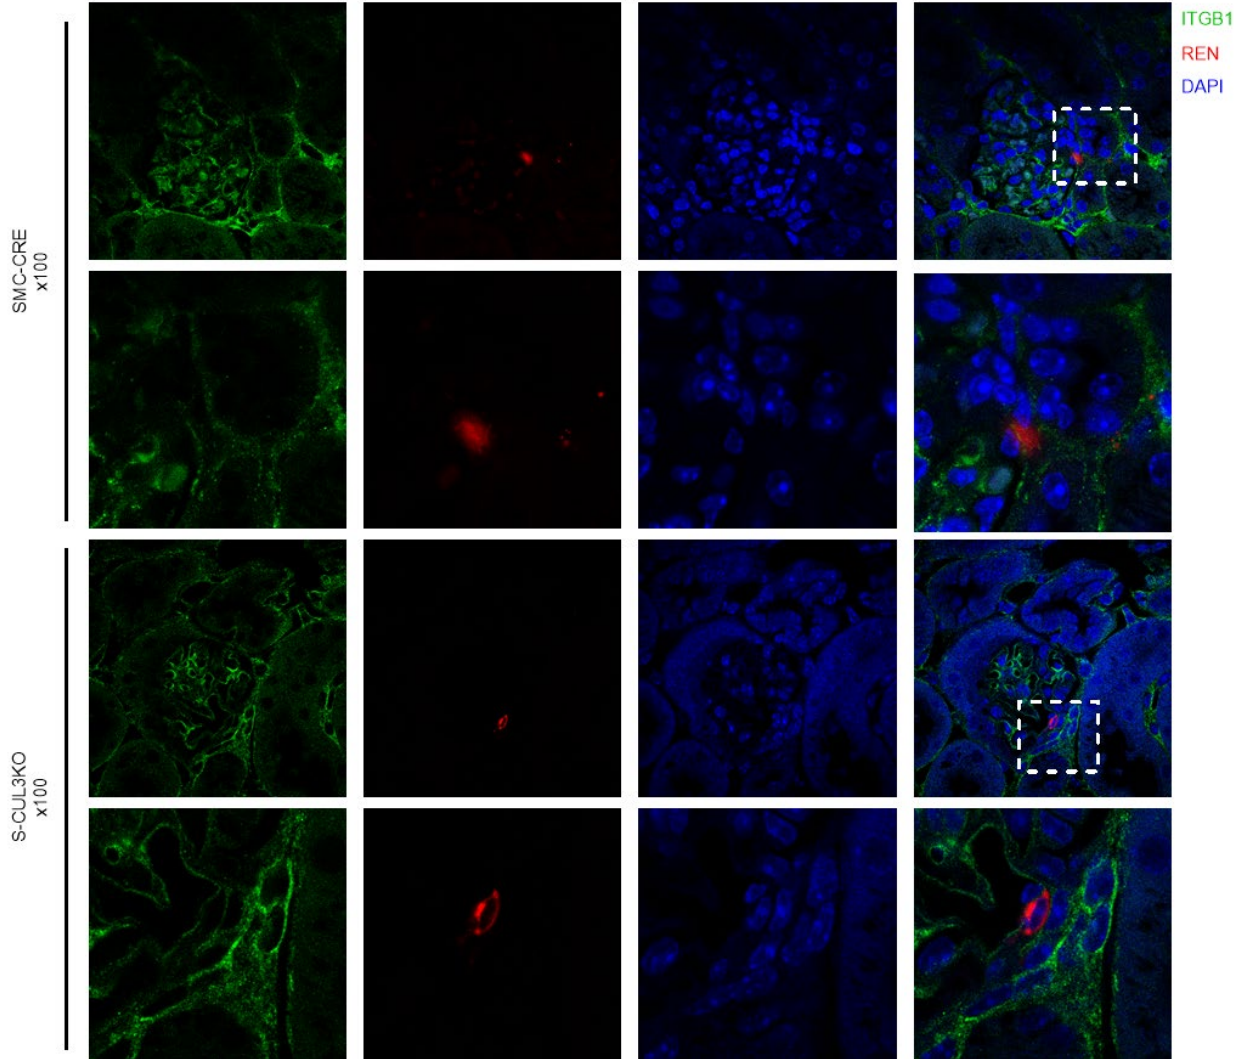

**Figure S6. Renal Integrin  $\beta$ 1 Expression.** Additional immunofluorescent images demonstrating integrin  $\beta$ 1 (green) and *Ren1* (red) protein in the JG area protein expression in the renin-expressing cells in the JG area, merged pictures. N=3-4/group
